# Supplementary material
Source: MDPI journal article supplement (https://www.mdpi.com/2073-4433/10/5/272)
Supplement: s1 [file s1]

# Supplementary Materials: Surface Heat Budget over the North Sea in Climate Change Simulations — Supplementary Material

Christian Dieterich <sup>1,\*</sup>, Shiyu Wang <sup>1</sup>, Semjon Schimanke <sup>1</sup>, Matthias Gröger <sup>1</sup>, Birgit Klein <sup>2</sup>, Robinson Hordoir <sup>1,3</sup>, Patrick Samuelsson <sup>1</sup>, Ye Liu <sup>1</sup>, Lars Axell <sup>1</sup>, Anders Höglund <sup>1</sup> and H. E. Markus Meier <sup>1,4</sup>

## 1. Model Description

### 1.1. Open Boundary Conditions

For the current setup of NEMO-Nordic climatological monthly profiles of sea surface height (SSH) are prescribed along the open boundaries along  $\sim 4^\circ\text{W}$  and along  $\sim 59^\circ\text{N}$ . The SSH has been taken from a historical run with the global ocean model MPIOM [1] and is prescribed for RCA4-NEMO ERA40 hindcast runs. The SSH from the MPIOM run is a 50-year climatological mean for the years 1960 to 2009. To allow for higher volume transports across the open boundary of NEMO-Nordic the SSH profiles have been deformed to reflect the bathymetry and resolution used in NEMO-Nordic. Sensitivity studies with the Hamburg Shelf Ocean Model HAMSOM by Mathis *et al.* [2] have shown that the profile of SSH prescribed as boundary conditions are of major importance for the circulation in the North Sea.

The mean sea level in global ocean models rises due to different processes and the sea level in the regional ocean model co-varies as it is prescribed as a boundary condition. What is more relevant dynamically, is the gradients in sea level along the open boundaries of the regional ocean model. These gradients determine the transport across the boundary and thus the means of communication between the regional ocean model and the outside world. When the outside is represented by an ERA40 hindcast the SSH on the open boundary of NEMO-Nordic is prescribed as a climatological monthly profile adapted from a historical MPIOM run. For the scenario simulations the boundary conditions on the open boundary of NEMO-Nordic ought to reflect changes going on in the global ocean models. These changes include dynamical changes due to circulation changes in atmosphere and ocean plus the diagnosed thermosteric expansion. Not included are the addition of mass due to glacier and ice sheet melting or changes in land water storage [3]. Also the glacial isostatic adjustment has not been taken into account for the construction of the boundary conditions. The profiles of absolute SSH are then taken from the OGCM output and treated in the same way as the SSH for the hindcast runs to increase the normal transports. All the sea level gradients on the boundary exhibit strong seasonal, interannual and decadal variability during the 21<sup>st</sup> century. Even though the sea level itself increases on the boundary over the course of the century mean transports change only slightly compared to the variability. Only the sea level across the Norwegian Coastal Current and the sea level difference between the Fair Isle Current and the inflow through the English Channel tend to increase by  $\sim 5$  cm. The increased transport in the Norwegian Coastal Current is likely to be caused by an increased freshwater signal from the European continent (see below) and the changing balance between inflows through the Fair Isle Current and the English Channel might reflect changes in the circulation in the North East Atlantic.

In the present setup the volume transport across the open boundaries is calculated according to Flather [4] given the prescribed profiles of SSH. Additionally, eleven tidal harmonic constituents (M2, S2, N2, K2, K1, O1, P1, Q1, M4, MS4, MN4) from the tidal model for the European Shelf [5] are prescribed to allow the North Sea to resonate. For temperature and salinity climatological monthly sections from Janssen *et al.* [6] are used as boundary conditions along the open boundaries for the ERA40 hindcast runs. For the scenario simulations temperature and salinity are sampled from the

40 OGCMs and prescribed as monthly mean sections. Temperature and salinity are subject to a flow  
41 relaxation scheme [7] that also calculates the normal baroclinic velocities on the open boundary.

### 42 1.2. River Discharge

43 All RCA4-NEMO experiments use the same daily runoff based on a simulation with the  
44 hydrological model E-HYPE [8]. E-HYPE was driven with ERA-interim data downscaled by RCA4 for  
45 the period 1979 to 2008. During this period the daily runoff is used directly as boundary conditions to  
46 NEMO-Nordic. Prior to that (1961 to 1978) a daily climatology of the runoff is applied. For the scenario  
47 period 2006 (2001 for the SRES scenario) to 2099 the daily climatology is prescribed for most of the  
48 rivers. Only for the Bothnian Sea and Bothnian Bay we increase the runoff linearly by +10% at the end  
49 of the century. This is done in accordance with a projected increase in precipitation in the northern  
50 Baltic Sea [e.g. 9,10]. In total, 424 river mouth locations are implemented into the model system.  
51 Some 220 are located in the Baltic Sea, roughly 50 in the Kattegat and Belt Sea and the remaining 150  
52 discharge into the North Sea. The averaged river discharge amounts to  $\sim 16400 \text{ m}^3/\text{s}$  into the Baltic  
53 Sea and  $13000 \text{ m}^3/\text{s}$  into the North Sea which is in the range of observations [11]. In this version of  
54 RCA4-NEMO the river water from all rivers enter the ocean model without carrying any momentum  
55 and with the same temperature as in the adjacent ocean. The salinity of river water is set to  $1 \text{ mg}/\text{kg}$ .

56 Due to positive net precipitation (precipitation minus evaporation) plus river discharge the  
57 Baltic Sea has on average a positive water balance which leads to a freshwater outflow. The mean  
58 outflow for the period 1970 to 1999 for the different RCA4-NEMO experiments varies between  $17670$   
59  $\text{m}^3/\text{s}$  (EC-EARTH) and  $20550 \text{ m}^3/\text{s}$  (ECHAM5 20C). The outflow of the ERA40 run amounts to  $17890$   
60  $\text{m}^3/\text{s}$ . The lower figures are higher than the observations, e.g.  $16115 \text{ m}^3/\text{s}$  by Meier and Kauker [12],  
61 while the upper limit severely overestimates the freshwater surplus. One reason is a overestimation of  
62 river discharge in the E-HYPE data. Reports on river discharge range from  $14085$  to  $15053 \text{ m}^3/\text{s}$  [12]  
63 and  $13600 \text{ m}^3/\text{s}$  [13] depending on, e.g. the period analyzed and the method used.

64 However, another contribution to the overestimation of the freshwater surplus is due to net  
65 precipitation. The RCA4-NEMO simulation with the largest freshwater surplus (ECHAM5 20C) has  
66 a net precipitation of  $\sim 3700 \text{ m}^3/\text{s}$  averaged over the Baltic Sea for the period 1970 to 1999. In the  
67 ERA40 run net precipitation is  $1300 \text{ m}^3/\text{s}$  during the same period, while other studies report a net  
68 precipitation of  $1530 \text{ m}^3/\text{s}$  [13] and  $2030 \text{ m}^3/\text{s}$  [14]. Too much net precipitation in RCA4-NEMO leads  
69 to the high amount of freshwater outflow from the Baltic Sea in the current model setup. The net  
70 precipitation in RCA4-NEMO is strongly dependent on the driving GCM. The large freshwater outflow  
71 from the Baltic Sea contributes to the low sea surface salinity in the Norwegian Coastal Current (cf.  
72 Section 2).

### 73 1.3. Parameterizations

74 For NEMO-Nordic we use penetrative solar radiation split up into three spectral bands according  
75 to Lengaigne *et al.* [15], Morel [16]. Only a part of the shortwave radiation is taken up at the surface.  
76 Another portion penetrates into the water column and is absorbed in different depths depending on the  
77 attenuation properties of the water. In the case of an ecosystem model coupled to the physical model  
78 the attenuation of light could be predicted using the concentration of phytoplankton and yellow matter  
79 [17,18]. In the current version of NEMO-Nordic we use one single water type for the entire model  
80 domain. According to Aarup [19] the Secchi depth in the North Sea and Baltic Sea varies between less  
81 than  $1 \text{ m}$  in the German Bight to  $15 \text{ m}$  and more in the Norwegian Trench and the western Baltic Sea.  
82 Neglecting spatial and temporal variations in Secchi depth we assume a constant Secchi depth of  $9 \text{ m}$   
83 for the whole model domain. That translates into a depth of the euphotic zone of  $\sim 18 \text{ m}$  [19]. With the  
84 three band model of Lengaigne *et al.* [15] the target depth of the euphotic zone is approximated by  
85 three evenly partitioned contributions that reach down to  $11 \text{ m}$  for red,  $23 \text{ m}$  for green and  $31 \text{ m}$  for  
86 blue light.

87 To balance the momentum flux applied at the air-sea interface the model ocean is subject to no-slip  
88 conditions along the lateral walls and to quadratic friction on the ocean floor. The drag coefficient  
89 is calculated according to the law of the wall with a roughness length of 1 cm and varies between  
90  $5 \cdot 10^{-4}$  and  $8 \cdot 10^{-3}$ . A bottom boundary layer (BBL) according to Döscher and Beckmann [20] covers the  
91 bottom grid cells to parametrize density driven flow along the bathymetry. We use a diffusivity of  
92  $1000 \text{ m}^2/\text{s}$  in the BBL and assume the advective contributions to vanish. This is probably less relevant  
93 for the North Sea but more so for the exchange of water through the Danish Straits and the subsequent  
94 flow over the sills into the deeper basins of the Baltic Sea. Subgrid scale mixing of momentum and  
95 tracers is implemented with an isopycnal background viscosity and diffusivity of  $0.2 \text{ m}^2/\text{s}$ , respectively  
96 using a harmonic operator. Extra lateral viscosity with coefficients calculated following Griffies and  
97 Hallberg [21], Smagorinsky [22] helps to reduce the variance on small spatial scales and limit high  
98 current velocities in the upper water column along the coast of Norway and in the Åland Sea. Along  
99 the open boundaries a sponge zone of about  $0.75^\circ$  width is implemented where the viscosity increases  
100 quadratically from  $0.2 \text{ m}^2/\text{s}$  to  $200 \text{ m}^2/\text{s}$  towards the open boundary.

101 Vertical mixing in the water column is parametrized using the general length scale implementation  
102 of the  $k - \epsilon$  turbulence model [23]. Following Burchard and Bolding [24], Bolding *et al.* [25] we use  
103 lower limits for the turbulent kinetic energy ( $k_{min} = 10^{-6} \text{ m}^2/\text{s}^2$ ) and the dissipation rate ( $\epsilon_{min} = 10^{-12}$   
104  $\text{m}^2/\text{s}^3$ ) to account for unresolved processes. As suggested by Burchard and Bolding [24] we use flux  
105 boundary conditions for turbulent kinetic energy and dissipation rate. To diagnose viscosity and  
106 diffusivity the stability functions of Canuto *et al.*'s (2001) model A are applied as proposed by Bolding  
107 *et al.* [25].

108 A time step that satisfies the different criteria for numerical stability in topographic gradient,  
109 friction, mixing, advection and wave propagation turns out to be of the order of 180 s with a barotropic  
110 sub-step of 10 s.

#### 111 1.4. Initial Conditions

112 All the model runs with the RCM have been started from an atmosphere and an ocean at rest,  
113 initialized with representative profiles for the active tracers. The first nine years 1961 to 1969 are used  
114 to spin up the system. For the Baltic Sea with a freshwater residence time of 35 years [14] that is a short  
115 time span and the deep Baltic Sea might not be in a quasi stationary state after the spin up. For the  
116 North Sea where vertical mixing homogenizes the whole water column during winter a spin up of  
117 one year would be sufficient [27]. Since there is no multi-year ice in the Baltic Sea a spin up of one  
118 year is adequate for the ice model. The atmosphere only needs a couple of weeks to spin up, but to  
119 equilibrate e.g. soil moisture may take several years [e.g. 28,29].

## 120 2. Model Validation

### 121 2.1. Evaluation of SSS

122 The downscaled runs GFDL-ESM2M, HadGEM2-ES and IPSL-CM5A-MR are too fresh. The  
123 different mean SSSs among the experiments can be attributed partly to the different amount of volume  
124 transport in the Norwegian Coastal Current (Tab. S1) and the freshwater outflow from the Baltic Sea  
125 (Fig. S1). The most important factor is the vertical distribution of freshwater in the outflow from the  
126 Baltic Sea, however. The freshwater height in the Norwegian Coastal Current is similar in all the  
127 experiments (not shown) and amounts to  $\sim 6$  m off Kristiansand compared to  $\sim 5$  m put forward by  
128 Gustafsson and Stigebrandt [30]. One reason for the model bias in freshwater height is the somewhat  
129 drier conditions in the period 1950 to 1990 where the bulk of data was available for Gustafsson and  
130 Stigebrandt's (1996) study.

131 The cause for too low averaged SSS in the ocean only ERA40 hindcast is the very fresh surface  
132 water in the outflow of the Baltic Sea. The amount of freshwater is similar to the coupled ERA40  
133 hindcast but the vertical distribution is different (not shown). In the coupled ERA40 hindcast the

134 freshwater penetrates deeper into the water column. This is due to differing fluxes between atmosphere  
135 and ocean between these two model runs. Most likely the amount of energy in the wind (Fig. S4)  
136 that translates into turbulent kinetic energy in the mixed layer of the ocean leads to deeper mixing of  
137 surface freshwater. This argument applies also to differences in averaged SSS among the historical  
138 periods of the scenario experiments.

139 SSS tends to be within  $\pm 0.5$  g/kg of the climatological annual mean of the ICES climatology  
140 (Fig. S1) and the KNSC dataset (not shown) which are derived basically from the same observations.  
141 An exception are the outflow from the Baltic Sea and the discharge from the river mouths of the largest  
142 rivers in the North Sea. To some extent the resolution in the gridded data might not be sufficient to  
143 resolve the freshwater tongues that form downstream of these river mouths. That would lead to fresh  
144 bias in the model results. It is likely however, that the harmonic operator used to implement subgrid  
145 scale mixing of tracers and momentum is not capable to parametrize the complex dynamics in these  
146 regions. The combined river outlets of Rhine/Meuse/Scheldt/Ijssel and the Ems/Jade/Weser/Elbe  
147 tend to have a regional impact in the Southern Bight and in the German Bight, respectively. All model  
148 solutions are much too fresh along the Dutch coast. In the German Bight there is a more complex, but  
149 consistent pattern of SSS biases compared to the ICES climatology. The consistency among the model  
150 solutions indicates that model deficiencies are responsible for the SSS biases along the continental coast.  
151 Mixing by eddies and baroclinic instability are not properly resolved and these processes are mostly  
152 represented as parameterizations. In sensitivity runs it was observed that mixing along geopotential  
153 levels improves the sea surface salinity in the eastern part of the North Sea substantially over the  
154 standard ERA40 hindcast that uses isopycnic mixing. Further improvements were found with a  
155 biharmonic mixing scheme over a harmonic operator. More importantly the outflow of the Baltic Sea  
156 is too fresh by up to 3 g/kg along the coast of Norway. The large fresh biases are confined mostly  
157 to the region north of the 100 m isobath. In Section 1 we argued that the too large freshwater export  
158 from the Baltic Sea affects the SSS in the Norwegian Coastal Current. Additionally, weak transports  
159 (Tab. S1) towards the north across the open boundary seem to inhibit the removal of freshwater from  
160 the outflow region of the Baltic Sea.

## 161 2.2. Circulation and Volume Transport

162 By means of Fig. S2 some of the major features of the depth averaged circulation in the North  
163 Sea can be identified. There is a broad southward flow around  $0^\circ$ E that recirculates in several loops  
164 first to the east and then back to the north which may be identified with the Dooley Current. The  
165 currents (and transports) in the Fair Isle Current at the northwestern model boundary are rather weak  
166 in this model setup. Further south the British coastal water flows eastward through the Silver Pit  
167 and is joined by Channel water. One branch of the circulation follows northeastward in a broad band  
168 and then turns northward to follow approximately the 40 m isobath. At around  $57^\circ$ N most of the  
169 flow retroflects eastward to feed the Jutland Current. Another part of the current flows to northwest  
170 between the 100 m and 200 m isobaths where it meets the southeastward flowing Atlantic water. The  
171 Norwegian Coastal Current is visible as a narrow band of high velocities along the coast of Norway.  
172 Overall, the circulation reflects the well known cyclonic circulation in the North Sea.

173 Table S1 summarizes volume transports across representative sections in the North Sea. Across  
174 the sections in the English Channel there is between 0.12 and 0.21 Sv entering the North Sea in the  
175 different model solutions. Otto *et al.* [31] list a volume transport of 0.10 to 0.17 Sv. Compared to the  
176 value of 0.094 Sv measured by Prandle *et al.* [32] however, the inflow from the English Channel is  
177 nearly double the observed volume flow for most of the model solutions. The ERA40 hindcast using  
178 a climatological monthly SSH on the open boundary (cf. Section 1) is the model run with the least  
179 amount of overestimation. The GCMs used on the boundaries of the RCM tend to overestimate the  
180 transport through the English Channel, except for the GFDL and IPSL models.

181 As laid out in Section 1 the Baltic Sea outflow is overestimated in the RCA4-NEMO ERA40  
182 hindcasts as well as in the historical periods of the scenario simulations (cf. section N9 in Tab. S1). The

183 recirculation in the Skagerrak, Jutland Current plus the inflow in the Norwegian Trench to the east and  
184 the outflow in the Norwegian Coastal Current amount to 0.5 to 0.6 Sv with slightly higher outflow due  
185 to the addition of the Baltic Sea outflow in the Norwegian Coastal Current. Estimates by Danielssen  
186 *et al.* [33] for the inflow and outflow of Atlantic water in the Skagerrak are of the order of  $1.0 \pm 0.5$  Sv.

187 The inflow of water from the Atlantic across  $59^\circ\text{N}$  is rather low in our model setup. Since the  
188 transport is de facto prescribed as a boundary condition there is room for improvement to adjust  
189 the normal transports across the open boundaries of the model domain. On the other hand it is the  
190 GCMs that provide the information on transports in and out of the North Sea. If the RCM cannot  
191 overcome the shortcomings of the GCM then the classical approach to a regional model with prescribed  
192 transports at its open boundaries reaches its limits. Solutions that allow the transport into the North  
193 Sea be determined in a consistent way [1,2,34,35] are more promising then.

194 Generally, the underestimation of meridional volume transports across the open boundaries of  
195 the regional ocean model will lead to an underestimation of the oceanic, advective contribution to the  
196 lateral heat transport in the heat budget of the North Sea.

### 197 2.3. Sensitivity of Volume Transports

198 A series of sensitivity experiments was conducted that focused on the influence of the open  
199 boundary condition in the ocean component, mainly the one in the northern North Sea. The aim was  
200 to understand whether the boundary conditions can be adjusted to improve the inflow from and the  
201 outflow to the Atlantic. In a first step the climatology for T, S and SSH was replaced by the ORAS4  
202 reanalysis [36]. From this reanalysis monthly mean values for T, S and SSH were interpolated onto the  
203 open boundary of the ocean component. This lead to somewhat smaller biases in SSS and to somewhat  
204 larger transports across the open boundary and a stronger recirculation in the Skagerrak as indicated  
205 in Tab. S1 (cf. ERA40 and ORAS4). The procedure described in Section 1 was applied to the ORAS4  
206 data to account for the higher resolution of the regional model. In the next step the barotropic transport  
207 was determined from the monthly ORAS4 reanalysis and used in the open boundary condition [4].  
208 This was a major improvement both for transports across the open boundary and for the salinity bias  
209 (experiment ORAS4 b). The recirculation in the Skagerrak increases to 0.8 Sv which is within the  
210 estimate of Danielssen *et al.* [33] of  $1.0 \pm 0.5$  Sv. The transport in the NCC increases to around 1 Sv. That  
211 is in agreement with observations. In the region affected by the Baltic Sea outflow a bias reduction for  
212 SSS of more than 1 g/kg was observed for this experiment. A further increase in the mean transports is  
213 seen when hourly SSH and transports from a storm surge model are applied additionally on the open  
214 boundary conditions. This experiment is listed as ORAS4 c in Table S1. Two additional experiments  
215 Surge and Surge b use only the hourly output of the storm surge model without any mean SSH or  
216 transports from the ORAS4 reanalysis or Janssen *et al.*'s (1999) climatology. The transports are very  
217 weak in both cases and are clearly insufficient to drive a realistic North Sea circulation. The experiment  
218 Surge b uses the same data as the experiment Surge, but the years 1979 to 2009 have been shuffled  
219 randomly. This was intended to test whether the barotropic signal traveling in from the North East  
220 Atlantic is relevant or whether it is just the variability in the northern North Sea.

221 The boundary conditions used in experiment ORAS4 b (and ORAS4 c) have improved the  
222 transports across the sections shown in Table S1 over the default model setup. What they did not  
223 improve is the tendency of a weak and too wide transport in the western part of the northern North Sea.  
224 A remodelling of the bathymetry, like opening up the closed wall between Scotland and the northern  
225 boundary along  $\sim 4^\circ\text{W}$ , a less smoothed bathymetry in the northwestern part of the model domain  
226 and a relocation of the open boundary further north will be considered for future model setups. A  
227 number of model studies [e.g. 37–40] have shown that regional models of the North Sea are capable of  
228 realistically represent volume transports even in the vicinity of open boundaries. Model development  
229 for the present setup will need to improve on volume transports in the North Sea.

#### 230 2.4. Validation of Wind Speed and Direction

231 Wind speed and direction time series exist locally for measurement stations as for instance the  
232 Marine Environmental Monitoring Network in the North Sea and Baltic Sea (MARNET) operated  
233 by the German Federal Maritime and Hydrographic Agency (BSH) or the FINO platforms. We use  
234 MARNET and FINO stations to validate wind speed and directions over the open North Sea.

235 The lowest measurements on FINO platforms is in 33 m height, so only wind direction can be  
236 used directly to compare with 10m wind from the atmosphere model. Wind speed is validated at two  
237 MARNET stations where the wind is quantified in 14m. In general, the ERA40 driven simulation does  
238 not set apart from the simulations driven with GCMs at the boundary. At both stations FINO1 (6.6  
239 °E, 54.0 °N) and FINO3 (7.2 °E, N 55.2 °N) the model solutions overestimate westerly to southerly  
240 wind directions by up to 3 m/s. The overestimation of westerly to southerly winds is balanced by an  
241 underrepresentation of NW and NE winds (Fig. S3).

242 Fig. S4 illustrates the PDF distributions of the daily mean wind speeds in the model compared to  
243 the MARNET stations Deutsche Bucht (7.5 °E, 54.2 °N) and Ems (6.3 °E, 54.2 °N). Whereas high wind  
244 speeds of more than 14 m/s are underestimated wind speeds around 10 m/s are mainly overestimated.  
245 Part of this discrepancy is related to the height of the measurements. The wind speed is measured in  
246 14 m at MARNET stations whereas model data is interpolated to 10 m. However, the discrepancy is  
247 also present for the SMHI stations along the coast of the Baltic Sea (not shown) which are taken at 10  
248 m. Based on instantaneous values we find an underestimation of high wind speeds (>17 m/s) along  
249 the Swedish coast of the Baltic Sea as for the North Sea stations. This underestimation of high wind  
250 speeds has been reported also by Ganske *et al.* [41] who investigated thoroughly wind speed of RCMs  
251 over the North Sea.

#### 252 2.5. Validation of SST and SSS

253 In a second part of the model validation results from the RCA4-NEMO ERA40 hindcast are  
254 compared to actual observations. Following Gröger *et al.* [42] the variability of the models temperature  
255 and salinity fields is compared to the Marine Environmental Data Base (MUDAB). During the period  
256 1999 to 2008 monthly mean temperature and salinity were sampled from the model solution and  
257 compared to O(5000) measurements from the observational data base. To group the measurements the  
258 North Sea was subdivided into 155 boxes. More data were available during winter and summer than  
259 during spring and fall. Most measurements were taken at the surface. The number of available data  
260 points decreased gradually with depth.

261 During this ten-year period the variability in T and S in the model solution compares well to the  
262 observed one with a rms error of 1.3 °C (0.5 g/kg) and a correlation of 0.93 (0.87) for temperature  
263 (salinity). The standard deviation of the model temperature closely matches the observed one with a  
264 value of 1.1 °C for both. The variability in salinity is somewhat lower in the model solution with a  
265 standard deviation of 0.92 g/kg compared to a value of 1.05 g/kg in the observations.

266

- 267 1. Sein, D.V.; Mikolajewicz, U.; Gröger, M.; Fast, I.; Cabos, W.; Pinto, J.G.; Hagemann, S.; Semmler, T.; Jacob, D.  
268 Regionally coupled atmosphere - ocean - sea ice - marine biogeochemistry model ROM. Part I: Description  
269 and validation. *J Adv Model Earth Sy* **2015**, *7*, 268–304. doi:10.1002/2014MS000357.
- 270 2. Mathis, M.; Mayer, B.; Pohlmann, T. An uncoupled dynamical downscaling for the North Sea: Method and  
271 evaluation. *Ocean Model* **2013**, *72*, 153 – 166. doi:http://dx.doi.org/10.1016/j.ocemod.2013.09.004.
- 272 3. Church, J.A.; Clark, P.U.; Cazenave, A.; Gregory, J.M.; Jevrejeva, S.; Levermann, A.; Merrifield, M.A.; Milne,  
273 G.A.; Nerem, R.S.; Nunn, P.D.; Payne, A.J.; Pfeffer, W.T.; Stammer, D.; Unnikrishnan, A.S. Sea Level Change.  
274 In *Climate Change 2013: The Physical Science Basis. Contribution of Working Group I to the Fifth Assessment*  
275 *Report of the Intergovernmental Panel on Climate Change*; Stocker, T.F.; Qin, D.; Plattner, G.K.; Tignor, M.; Allen,

- 276 S.K.; Boschung, J.; Nauels, A.; Xia, Y.; Bex, V.; Midgley, P.M., Eds.; Cambridge University Press: Cambridge,  
277 United Kingdom and New York, NY, USA, 2013; chapter 13, pp. 1137–1216.
- 278 4. Flather, R.A. A Storm-Surge Prediction Model for the Northern Bay of Bengal with  
279 Application to the Cyclone Disaster in April 1991. *J Phys Oceanogr* **1994**, *24*, 172–190.  
280 doi:{10.1175/1520-0485(1994)024<0172:ASSPMF>2.0.CO;2}.
- 281 5. Egbert, G.D.; Erofeeva, S.Y.; Ray, R.D. Assimilation of altimetry data for nonlinear shallow-water  
282 tides: Quarter-diurnal tides of the Northwest European Shelf. *Cont Shelf Res* **2010**, *30*, 668–679.  
283 doi:10.1016/j.csr.2009.10.011.
- 284 6. Janssen, F.; Schrum, C.; Backhaus, J.O. A Climatological Data Set of Temperature and Salinity for the Baltic  
285 Sea and the North Sea. *Hydrogr Z* **1999**, *Supplement*, 245 pp.
- 286 7. Engedahl, H. Use of the flow relaxation scheme in a three-dimensional baroclinic ocean model with realistic  
287 topography. *Tellus A* **1995**, *47*, 365–382. doi:10.1034/j.1600-0870.1995.t01-2-00006.x.
- 288 8. Donnelly, C.; Andersson, J.C.M.; Arheimer, B. Using flow signatures and catchment similarities  
289 to evaluate the E-HYPE multi-basin model across Europe. *Hydrolog Sci J* **2016**, *61*, 255–273.  
290 doi:10.1080/02626667.2015.1027710.
- 291 9. Meier, H.E.M.; Müller-Karulis, B.; Andersson, H.C.; Dieterich, C.; Eilola, K.; Gustafsson, B.G.; Höglund,  
292 A.; Hordoir, R.; Kuznetsov, I.; Neumann, T.; Ranjbar, Z.; Savchuk, O.P.; Schimanke, S. Impact of Climate  
293 Change on Ecological Quality Indicators and Biogeochemical Fluxes in the Baltic Sea: A Multi-Model  
294 Ensemble Study. *Ambio* **2012**, *41*, 558–573. doi:10.1007/s13280-012-0320-3.
- 295 10. Donnelly, C.; Yang, W.; Dahné, J. River discharge to the Baltic Sea in a future climate. *Climatic Change* **2014**,  
296 *122*, 157–170. doi:10.1007/s10584-013-0941-y.
- 297 11. Bergström, S.; Carlsson, B. River runoff to the Baltic Sea - 1950-1990. *Ambio* **1994**, *23*, 280–287.
- 298 12. Meier, H.E.M.; Kauker, F. Sensitivity of the Baltic Sea salinity to the freshwater supply. *Clim Res* **2003**,  
299 *24*, 231–242. doi:10.3354/cr024231.
- 300 13. Omstedt, A.; Axell, L.B. Modeling the variations of salinity and temperature in the large Gulfs of the Baltic  
301 Sea. *Cont Shelf Res* **2003**, *23*, 265–294.
- 302 14. Meier, H.E.M.; Kauker, F. Modeling decadal variability of the Baltic Sea: 2. Role of freshwater inflow and  
303 large-scale atmospheric circulation for salinity. *J Geophys Res* **2003**, *108*, 3368. doi:10.1029/2003JC001799.
- 304 15. Lengaigne, M.; Menkes, C.; Aumont, O.; Gorgues, T.; Bopp, L.; André, J.M.; Madec, G. Influence of the  
305 oceanic biology on the tropical Pacific climate in a coupled general circulation model. *Clim Dynam* **2007**,  
306 *28*, 503–516. doi:10.1007/s00382-006-0200-2.
- 307 16. Morel, A. Optical modeling of the upper ocean in relation to its biogenous matter content (case I waters). *J*  
308 *Geophys Res* **1988**, *93*, 10749–10768. doi:10.1029/JC093iC09p10749.
- 309 17. Kuznetsov, I.; Eilola, K.; Dieterich, C.; Hordoir, R.; Axell, L.; Höglund, A.; Schimanke, S. Model study  
310 on the variability of ecosystem parameters in the Skagerrak-Kattegat area, effect of load reduction in the  
311 North Sea and possible effect of BSAP on Skagerrak-Kattegat area. *Oceanografi* 119, SMHI, 2016.
- 312 18. Löptien, U.; Meier, H.E.M. Simulated distribution of colored dissolved organic matter in the Baltic Sea.  
313 *Oceanografi* 109, SMHI, 2011.
- 314 19. Aarup, T. Transparency of the North Sea and Baltic Sea - a Secchi depth data mining study. *Oceanologia*  
315 **2002**, *44*, 323–337.
- 316 20. Döscher, R.; Beckmann, A. Effects of a Bottom Boundary Layer Parameterization in a  
317 Coarse-Resolution Model of the North Atlantic Ocean. *J Atmos Ocean Tech* **2000**, *17*, 698–707.  
318 doi:10.1175/1520-0426(2000)017<0698:EOABBL>2.0.CO;2.
- 319 21. Griffies, S.M.; Hallberg, R.W. Biharmonic Friction with a Smagorinsky-Like Viscosity for  
320 Use in Large-Scale Eddy-Permitting Ocean Models. *Mon Weather Rev* **2000**, *128*, 2935–2946.  
321 doi:10.1175/1520-0493(2000)128<2935:BFWASL>2.0.CO;2.
- 322 22. Smagorinsky, J. General Circulation Experiments with the Primitive Equations: 1 the Basic Experiment.  
323 *Mon Weather Rev* **1963**, *91*, 99–164. doi:10.1175/1520-0493(1963)091<0099:GCEWTP>2.3.CO;2.
- 324 23. Madec, G. *NEMO ocean engine*. IPSL, Paris, France, 3.3 ed., 2011.
- 325 24. Burchard, H.; Bolding, K. Comparative Analysis of Four Second-Moment Turbulence  
326 Closure Models for the Oceanic Mixed Layer. *J Phys Oceanogr* **2001**, *31*, 1943–1968.  
327 doi:10.1175/1520-0485(2001)031<1943:CAOFSM>2.0.CO;2.

- 328 25. Bolding, K.; Burchard, H.; Pohlmann, T.; Stips, A. Turbulent mixing in the Northern North Sea: a numerical  
329 model study. *Cont Shelf Res* **2002**, *22*, 2707–2724. doi:http://dx.doi.org/10.1016/S0278-4343(02)00122-X.
- 330 26. Canuto, V.M.; Howard, A.; Cheng, Y.; Dubovikov, M.S. Ocean Turbulence. Part I: One-Point  
331 Closure Model–Momentum and Heat Vertical Diffusivities. *J Phys Oceanogr* **2001**, *31*, 1413–1426.  
332 doi:10.1175/1520-0485(2001)031<1413:OTPIOP>2.0.CO;2.
- 333 27. Pohlmann, T. Predicting the thermocline in a circulation model of the North Sea - Part 1: model description,  
334 calibration and verification. *Cont Shelf Res* **1996**, *16*, 131–146. doi:10.1016/0278-4343(95)90885-S.
- 335 28. Cosgrove, B.A.; Lohmann, D.; Mitchell, K.E.; Houser, P.R.; Wood, E.F.; Schaake, J.C.; Robock, A.;  
336 Sheffield, J.; Duan, Q.; Luo, L.; Higgins, R.W.; Pinker, R.T.; Tarpley, J.D. Land surface model spin-up  
337 behavior in the North American Land Data Assimilation System (NLDAS). *J Geophys Res-Atmos* **2003**, *108*.  
338 doi:10.1029/2002JD003316.
- 339 29. Yang, Y.; Uddstrom, M.; Duncan, M. Effects of short spin-up periods on soil moisture simulation and the  
340 causes over New Zealand. *J Geophys Res-Atmos* **2011**, *116*. doi:10.1029/2011JD016121.
- 341 30. Gustafsson, B.; Stigebrandt, A. Dynamics of the freshwater-influenced surface layers in the Skagerrak. *J*  
342 *Sea Res* **1996**, *35*, 39–53. doi:10.1016/S1385-1101(96)90733-9.
- 343 31. Otto, L.; Zimmerman, J.T.F.; Furnes, G.K.; Mork, M.; Saetre, R.; Becker, G. Review of the physical  
344 oceanography of the North Sea. *Neth J Sea Res* **1990**, *26*, 161–238. doi:10.1016/0077-7579(90)90091-T.
- 345 32. Prandle, D.; Ballard, G.; Flatt, D.; Harrison, A.J.; Jones, S.E.; Knight, P.J.; Loch, S.; McManus, J.; Player, R.;  
346 Tappin, A. Combining modelling and monitoring to determine fluxes of water, dissolved and particulate  
347 metals through the Dover Strait. *Cont Shelf Res* **1996**, *16*, 237–257. doi:10.1016/0278-4343(95)00009-P.
- 348 33. Danielssen, D.S.; Edler, L.; Fonselius, S.; Hernroth, L.; Ostrowski, M.; Svendsen, E.; Talpsepp, L.  
349 Oceanographic variability in the Skagerrak and Northern Kattegat, May-June, 1990. *ICES J Mar Sci*  
350 **1997**, *54*, 753–773. doi:doi: 10.1006/jmsc.1996.0210.
- 351 34. Marsland, S.J.; Haak, H.; Jungclaus, J.H.; Latif, M.; Röske, F. The Max-Planck-Institute global  
352 ocean/sea ice model with orthogonal curvilinear coordinates. *Ocean Model* **2003**, *5*, 91–127.  
353 doi:10.1016/S1463-5003(02)00015-X.
- 354 35. Holt, J.; Wakelin, S.; Lowe, J.; Tinker, J. The potential impacts of climate change on the hydrography of the  
355 northwest European continental shelf. *Prog Oceanogr* **2010**, *86*, 361–379. doi:10.1016/j.pocean.2010.05.003.
- 356 36. Balmaseda, M.A.; Mogensen, K.; Weaver, A.T. Evaluation of the ECMWF ocean reanalysis system ORAS4.  
357 *Q J Roy Meteor Soc* **2013**, *139*, 1132–1161. doi:10.1002/qj.2063.
- 358 37. Holt, J.; Proctor, R. The seasonal circulation and volume transport on the northwest European continental  
359 shelf: A fine-resolution model study. *J Geophys Res* **2008**, *113*. doi:10.1029/2006JC004034.
- 360 38. Su, J.; Sein, D.V.; Mathis, M.; Mayer, B.; O'Driscoll, K.; Chen, X.; Mikolajewicz, U.; Pohlmann, T. Assessment  
361 of a zoomed global model for the North Sea by comparison with a conventional nested regional model.  
362 *Tellus A* **2014**, *66*, 23927. doi:10.3402/tellusa.v66.23927.
- 363 39. Mathis, M.; Elizalde, A.; Mikolajewicz, U.; Pohlmann, T. Variability patterns of the general circulation and  
364 sea water temperature in the North Sea. *Prog Oceanogr* **2015**, *135*, 91–112. doi:10.1016/j.pocean.2015.04.009.
- 365 40. Pätsch, J.; Burchard, H.; Dieterich, C.; Gräwe, U.; Gröger, M.; Mathis, M.; Kapitza, H.; Bersch, M.; Moll,  
366 A.; Pohlmann, T.; Su, J.; Ho-Hagemann, H.T.M.; Schulz, A.; Elizalde, A.; Eden, C. An evaluation of the  
367 North Sea circulation in global and regional models relevant for ecosystem simulations. *Ocean Model* **2017**,  
368 *111*, 70–95. doi:https://doi.org/10.1016/j.ocemod.2017.06.005.
- 369 41. Ganske, A.; Tinz, B.; Rosenhagen, G.; Heinrich, H. Interannual and Multidecadal Changes of Wind  
370 Speed and Directions over the North Sea from Climate Model Results. *Meteorol Z* **2016**, *25*, 463–478.  
371 doi:10.1127/metz/2016/0673.
- 372 42. Gröger, M.; Maier-Reimer, E.; Mikolajewicz, U.; Moll, A.; Sein, D. NW European shelf under climate  
373 warming: implications for open ocean - shelf exchange, primary production, and carbon absorption.  
374 *Biogeosciences* **2013**, *10*, 3767–3792. doi:10.5194/bg-10-3767-2013.
- 375 43. Klein, H.; Lange, W.; Mittelstaedt, E. Tidal and Residual Currents in the Northern North Sea: Observations.  
376 *Dtsch Hydrogr Z* **1994**, *46*, 5–27. doi:10.1007/BF02225739.



377 **List of Figures**

|     |    |                                                                                           |    |
|-----|----|-------------------------------------------------------------------------------------------|----|
| 378 | S1 | Climatological annual mean SSS biases (g/kg) for different RCA4-NEMO experiments          |    |
| 379 |    | relative to KNSC. ERA40 (upper row, left), Ensemble mean (upper row, middle),             |    |
| 380 |    | MPI-ESM-LR (upper row, right), EC-EARTH (middle row, left), GFDL-ESM2M (middle            |    |
| 381 |    | row, middle), HadGEM2-ES (middle row, right), IPSL-CM5A-MR (lower row, left),             |    |
| 382 |    | ECHAM5 (lower row, middle) and ocean only run (lower row, right). The averaging           |    |
| 383 |    | period for the model data and the observational data span the years 1970 to 1999. . . . . | 10 |
| 384 | S2 | Climatological annual mean near surface currents (m/s) for the RCA4-NEMO ERA40            |    |
| 385 |    | hindcast. The reference vector represents a velocity of 0.25 m/s. Only at every fourth    |    |
| 386 |    | grid point a vector is drawn. The colored section drawn in the figure are those where     |    |
| 387 |    | transports are sampled and listed in Tab. S1. The four stations for the wind roses and    |    |
| 388 |    | wind histograms in Figures S3 and S4 are marked as red triangles in the figure. . . . .   | 11 |
| 389 | S3 | Wind roses at stations FINO1 (left) and FINO3 (right) during the period September         |    |
| 390 |    | 2004 to September 2006. The black sectors in the figure represents the measurements at    |    |
| 391 |    | 33 m height and the colored sectors represent the statistics of the 10m wind from the     |    |
| 392 |    | model solutions: ERA40 hindcast (green), ECHAM5 (yellow), MPI-ESM-LR (blue) and           |    |
| 393 |    | EC-EARTH (red), respectively. . . . .                                                     | 12 |
| 394 | S4 | Distribution of daily mean wind speed at stations Deutsche Bucht (left) and Ems (right)   |    |
| 395 |    | from MARNET during the period 1989 to 2006. The statistics of the observations at 14      |    |
| 396 |    | m height yields the shaded area. The statistics derived from the downscaled 10m wind      |    |
| 397 |    | are displayed for the ERA40 hindcast (black), MPI-ESM-LR (red), EC-EARTH (green),         |    |
| 398 |    | GFDL-ESM2M (blue), HadGEM2-ES (yellow), IPSL-CM5A-MR (rose) and ECHAM5                    |    |
| 399 |    | (olive), respectively. . . . .                                                            | 13 |

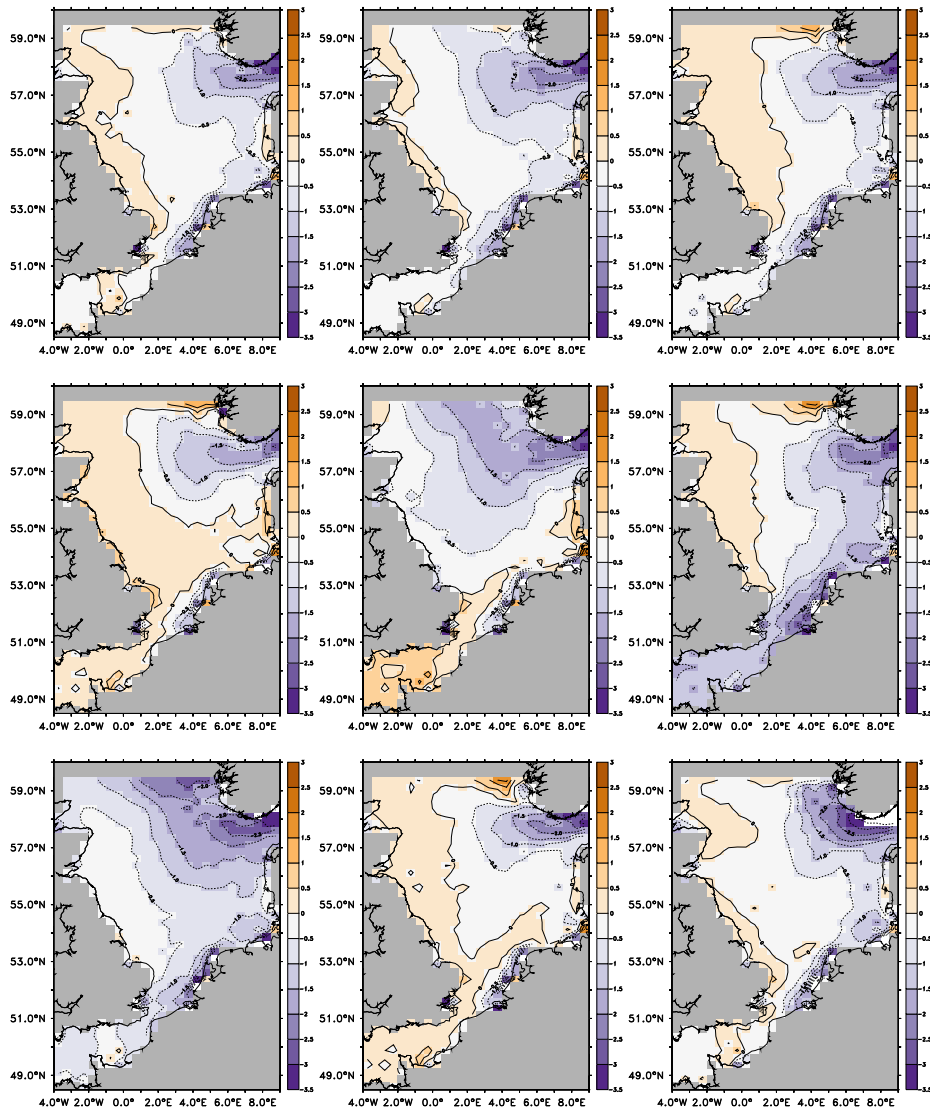

**Figure S1.** Climatological annual mean SSS biases (g/kg) for different RCA4-NEMO experiments relative to KNSC. ERA40 (upper row, left), Ensemble mean (upper row, middle), MPI-ESM-LR (upper row, right), EC-EARTH (middle row, left), GFDL-ESM2M (middle row, middle), HadGEM2-ES (middle row, right), IPSL-CM5A-MR (lower row, left), ECHAM5 (lower row, middle) and ocean only run (lower row, right). The averaging period for the model data and the observational data span the years 1970 to 1999.

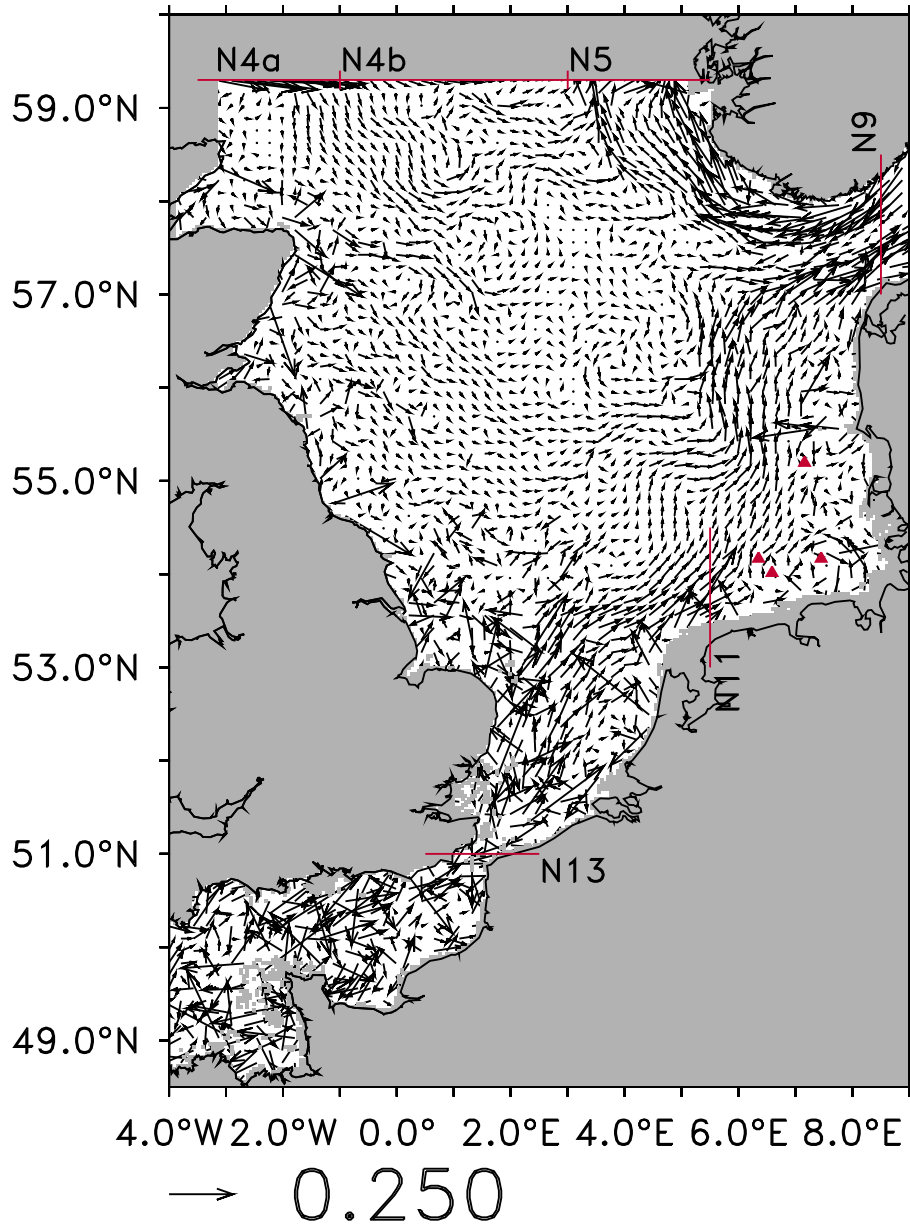

**Figure S2.** Climatological annual mean near surface currents (m/s) for the RCA4-NEMO ERA40 hindcast. The reference vector represents a velocity of 0.25 m/s. Only at every fourth grid point a vector is drawn. The colored section drawn in the figure are those where transports are sampled and listed in Tab. S1. The four stations for the wind roses and wind histograms in Figures S3 and S4 are marked as red triangles in the figure.

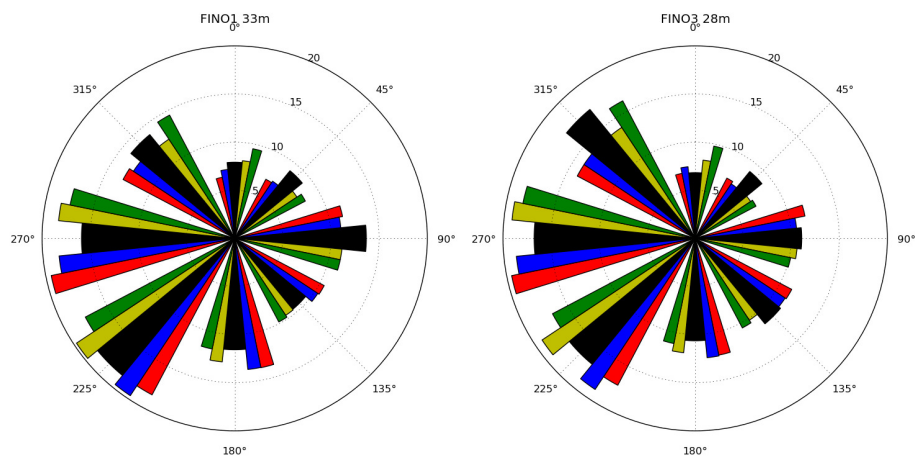

**Figure S3.** Wind roses at stations FINO1 (left) and FINO3 (right) during the period September 2004 to September 2006. The black sectors in the figure represents the measurements at 33 m height and the colored sectors represent the statistics of the 10m wind from the model solutions: ERA40 hindcast (green), ECHAM5 (yellow), MPI-ESM-LR (blue) and EC-EARTH (red), respectively.

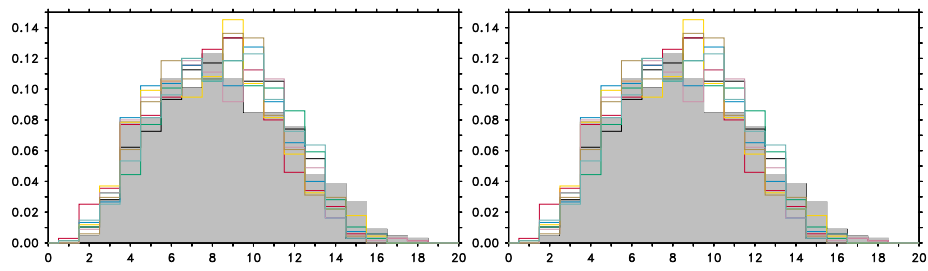

**Figure S4.** Distribution of daily mean wind speed at stations Deutsche Bucht (left) and Ems (right) from MARNET during the period 1989 to 2006. The statistics of the observations at 14 m height yields the shaded area. The statistics derived from the downscaled 10m wind are displayed for the ERA40 hindcast (black), MPI-ESM-LR (red), EC-EARTH (green), GFDL-ESM2M (blue), HadGEM2-ES (yellow), IPSL-CM5A-MR (rose) and ECHAM5 (olive), respectively.

400 **List of Tables**

401 S1 Summary of volume transports (Sv) during period P0 (1970-1999) for representative  
 402 sections in the North Sea for hindcast and scenario experiments conducted with  
 403 RCA4-NEMO. The names of the sections are based on the NOOS section network.  
 404 N13 (Strait of Dover, 51 °N), N11 (Terschelling, 5.5 °E, 53 °N to 54.5 °N), N9 (Skagerrak,  
 405 8.5 °E), N4a (Fair Isle Current, 59.3 °N, 4 °W to 1 °W), N4b (Atlantic inflow, 59.3 °N,  
 406 1 °W to 3 °E), N5 (Norwegian Coastal Current, 59.3 °N, 3 °E to 6 °E), N4+5 (Orkney  
 407 - Utsira, 59.3 °N, 4 °W to 6 °E). The eastward volume transport across section N9 is  
 408 indicated in parentheses. For the NORA experiment (July to August, 1990) Klein *et al.*  
 409 [43] calculated volume transports across 59 °N which are reproduced in the row NORA.  
 410 Values given in row Obs. are the arithmetic mean values The lower part of the table  
 411 shows the climatological volume transports (Sv) during the years 1980 to 2009. The row  
 412 RCA4-NEMO shows results for the ERA40 hindcast. The remainder of the table list  
 413 results from sensitivity experiments using the ocean only version of the model, driven  
 414 with data from the coupled ERA40 hindcast. . . . . 15

**Table S1.** Summary of volume transports (Sv) during period P0 (1970-1999) for representative sections in the North Sea for hindcast and scenario experiments conducted with RCA4-NEMO. The names of the sections are based on the NOOS section network. N13 (Strait of Dover, 51 °N), N11 (Terschelling, 5.5 °E, 53 °N to 54.5 °N), N9 (Skagerrak, 8.5 °E), N4a (Fair Isle Current, 59.3 °N, 4 °W to 1 °W), N4b (Atlantic inflow, 59.3 °N, 1 °W to 3 °E), N5 (Norwegian Coastal Current, 59.3 °N, 3 °E to 6 °E), N4+5 (Orkney - Utsira, 59.3 °N, 4 °W to 6 °E). The eastward volume transport across section N9 is indicated in parentheses. For the NORA experiment (July to August, 1990) Klein *et al.* [43] calculated volume transports across 59 °N which are reproduced in the row NORA. Values given in row Obs. are the arithmetic mean values. The lower part of the table shows the climatological volume transports (Sv) during the years 1980 to 2009. The row RCA4-NEMO shows results for the ERA40 hindcast. The remainder of the table list results from sensitivity experiments using the ocean only version of the model, driven with data from the coupled ERA40 hindcast.

|               | N13  | N11  | N9            | N4a   | N4b   | N5   | N4+N5 |
|---------------|------|------|---------------|-------|-------|------|-------|
| ERA40         | 0.16 | 0.13 | -0.020 (0.57) | -0.19 | -0.17 | 0.54 | 0.18  |
| Ensemble mean | 0.17 | 0.16 | -0.020 (0.55) | -0.16 | -0.09 | 0.44 | 0.19  |
| MPI-ESM-LR    | 0.19 | 0.17 | -0.021 (0.52) | -0.12 | -0.09 | 0.44 | 0.23  |
| EC-EARTH      | 0.20 | 0.17 | -0.020 (0.56) | -0.17 | -0.01 | 0.40 | 0.22  |
| GFDL-ESM2M    | 0.14 | 0.14 | -0.021 (0.53) | -0.21 | -0.04 | 0.44 | 0.19  |
| HadGEM2-ES    | 0.18 | 0.15 | -0.019 (0.60) | -0.10 | -0.21 | 0.52 | 0.21  |
| IPSL-CM5A-MR  | 0.12 | 0.16 | -0.022 (0.59) | -0.18 | -0.08 | 0.42 | 0.16  |
| ECHAM5        | 0.21 | 0.19 | -0.024 (0.54) | -0.15 | -0.04 | 0.45 | 0.26  |
| NORA          |      |      | -0.27         | -0.14 | 0.72  | 0.32 |       |
| Obs.          | 0.14 |      | -0.017 (0.75) | -0.37 | -0.41 | 0.67 | 0.11  |
| RCA4-NEMO     | 0.17 | 0.14 | -0.020 (0.59) | -0.18 | -0.16 | 0.54 | 0.20  |
| ERA40         | 0.18 | 0.12 | -0.020 (0.57) | -0.16 | -0.15 | 0.52 | 0.21  |
| ORAS4         | 0.16 | 0.12 | -0.021 (0.65) | -0.26 | -0.17 | 0.62 | 0.19  |
| ORAS4 b       | 0.16 | 0.12 | -0.020 (0.82) | -0.16 | -0.63 | 0.98 | 0.19  |
| ORAS4 c       | 0.13 | 0.10 | -0.021 (0.86) | -0.22 | -0.71 | 1.09 | 0.16  |
| Surge         | 0.07 | 0.08 | -0.019 (0.46) | -0.10 | -0.10 | 0.29 | 0.09  |
| Surge b       | 0.07 | 0.08 | -0.022 (0.46) | -0.10 | -0.10 | 0.30 | 0.10  |
